# Supplementary material
Source: publisher figshare collection journal article supplement (https://tandf.figshare.com/ndownloader/files/30921829)
Supplement: Supplementary file 1 [file 30921829]

## Supplementary material

Fig. S1 Respective HPLC-MS spectra of each compound. The quasi-molecular ion peak ( $[M-H]^-$ ) was marked with an arrow.

Arjunolic acid

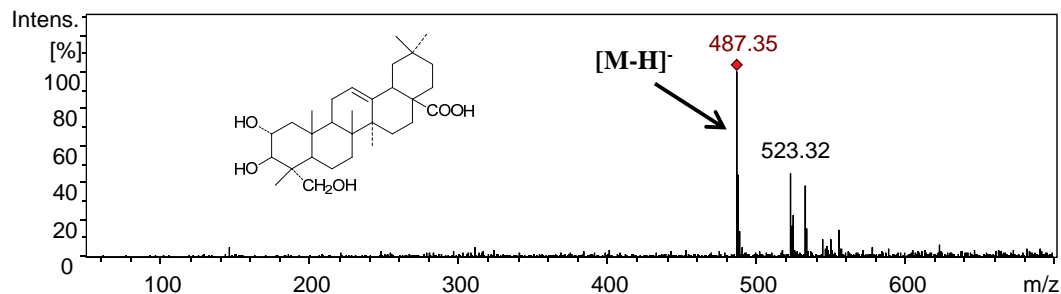

$2\alpha, 3\alpha, 23$ -trihydroxyursa-12, 20(30)-dien-28-oic acid

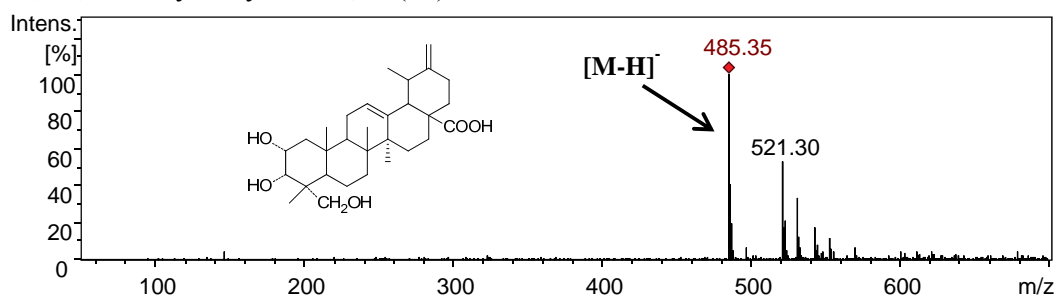

Cyclocaric acid B

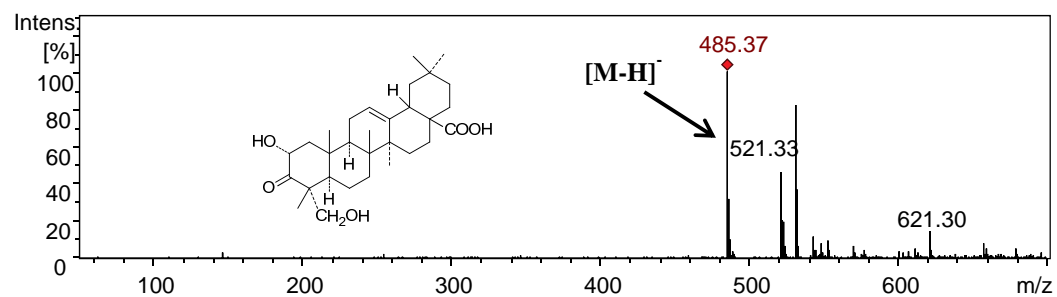

Pterocaryoside B

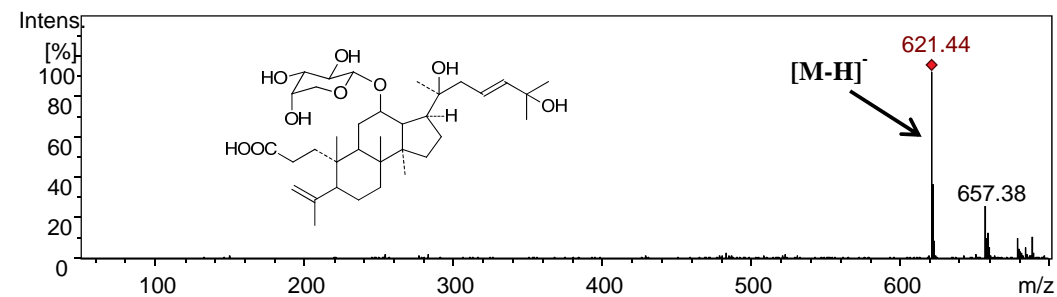

$2\alpha, 3\alpha, 23$ -trihydroxyurs-12-en-28-oic acid

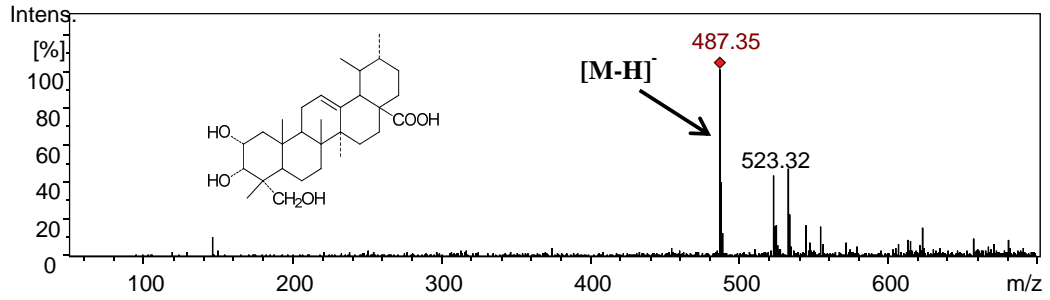

3β, 23-dihydroxy-12-ene-28-ursolic acid

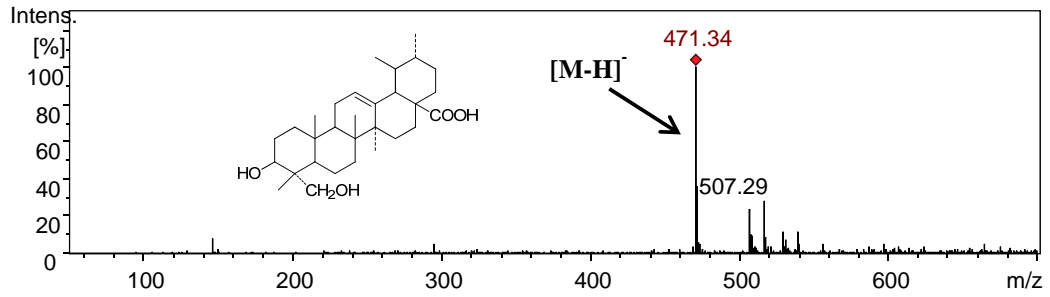

Hederagenin

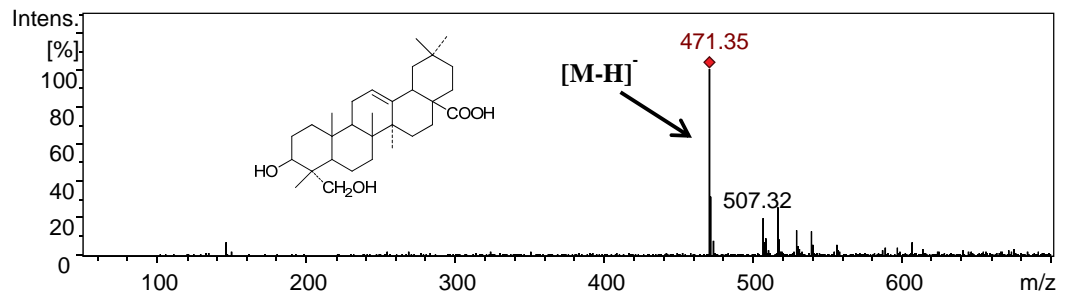

Oleanolic acid
